# Supplementary material for: Diabetes Leads to Alterations in Normal Metabolic Transitions of Pregnancy as Revealed by Time-Course Metabolomics
Source: Metabolites. 2020 Aug 27;10(9):350. doi: 10.3390/metabo10090350 (PMC7570364; doi:10.3390/metabo10090350)
Supplement: Supplementary file 1 [file metabolites-10-00350-s001.xlsx]

## Sheet: S1
Table S1: Confidence Scale for Metabolites in Maternal Serum and Cord Blood
Metabolite	ppm_right	ppm_left	Level
Leucine	0.9414	0.9621	3
Isoleucine	0.9869	1.007	4
Valine	1.016	1.04	4
BCAA	0.9084	1.04	-
Isobutyrate	1.047	1.068	2
2-Oxoisovalerate	1.116	1.139	2
Alanine	1.45	1.479	4
Arginine	1.634	1.649	3
Acetate	1.9	1.911	3
N-acetyl-glycoproteins	2.014	2.038	2
Acetone	2.21	2.221	2
Acetoacetate	2.261	2.269	2
3-Hydroxybutyrate	2.292	2.315	4
Proline/Glutamate	2.321	2.347	4
Pyruvate	2.352	2.361	3
Succinate	2.388	2.394	3
Glutamine	2.417	2.465	4
Citrate	2.499	2.536	4
Methionine	2.606	2.634	2
Asparagine	2.84	2.864	2
Dimethylglycine	2.909	2.916	2
Lysine	2.995	3.017	4
Creatinine	3.026	3.034	4
Ornithine	3.036	3.061	3
Choline	3.181	3.193	4
Glycolipids (GPC/PC)	3.191	3.215	1
Proline	3.309	3.328	3
Glycine	3.542	3.55	3
Glycerol	3.551	3.558	4
Myo-inositol	3.609	3.615	4
Betaine	3.882	3.888	4
Creatine	3.913	3.92	4
Serine	3.93	3.951	4
Lactate	4.073	4.11	4
Threonine	4.224	4.256	4
Mannose	5.162	5.177	3
Glucose	5.205	5.238	4
Tyrosine	6.871	6.9	4
Histidine	7.039	7.069	4
Phenylalanine	7.298	7.434	4
Formate	8.44	8.446	3
Lipids
CH3 fatty acids	0.7284	0.9667	1
(-CH2)n fatty acids	1.07	1.351	1
Beta-CH2 fatty acids	1.415	1.56	1
CH2CH=C fatty acids	1.858	2.037	1
Alpha-CH2 fatty acids	2.101	2.228	1
C=CCH2C=C fatty acids	2.595	2.773	1
Glyceryl C1,3H	3.955	4.259	1
Glyceryl C2H	5.076	5.159	1
CH=CH fatty acids	5.159	5.331	1
Maternal Serum Only
Dimethylsulfone	3.134	3.141	2
UDP-Glucose	8.165	8.196	2
Cord Blood Only
Dimethylamine	2.692	2.703	3
Ethanolamine	3.12	3.136	4
BCAA: Branched chain amino acids; UDP: Uridine diphosphate; GPC: Glycerophosphocholine; PC: Phosphocholine

## Sheet: S2
Table S2: Alterations in metabolites throughout pregnancy
Metabolite	p-value	FDR	Estimate
HbA1c	0.00422015	0.00532542	0.0796355
Leucine	5.20847e-05	8.12147e-05	-0.0253124
Isoleucine	2.17187e-21	1.43762e-20	-0.033678
Valine	8.07896e-25	1.0706e-23	-0.0911606
BCAA	4.43502e-15	1.68086e-14	-0.241286
Isobutyrate	1.11004e-11	3.46059e-11	0.00440833
2-Oxoisovalerate	0.288032	0.305313	-0.00813296
Alanine	0.00073427	0.00101009	-0.0515055
Arginine	1.71755e-09	4.28818e-09	-0.00270766
Acetate	0.449882	0.449882	0.0406244
N-acetyl-glycoproteins	2.27871e-06	4.028e-06	0.133103
Acetone	1.86764e-09	4.30913e-09	0.0366863
Acetoacetate	0.000560603	0.000803026	0.016621
3-Hydroxybutyrate	3.5008e-06	5.98387e-06	0.0176521
Pyruvate	8.07502e-11	2.25389e-10	0.0160193
Succinate	0.409057	0.416924	0.000404898
Glutamine	3.42147e-18	1.5105e-17	-0.103751
Citrate	3.3381e-09	7.37583e-09	0.0140811
Methionine	0.114651	0.129287	-0.00115272
Asparagine	0.225416	0.243817	-0.000674707
Dimethylglycine	0.000155488	0.000228913	-0.000865643
Lysine	1.85941e-19	9.858e-19	-0.0163193
Creatinine	3.20946e-15	1.30869e-14	-0.014905
Ornithine	6.60317e-15	2.332e-14	-0.012988
Dimethylsulfone	8.55659e-09	1.81472e-08	-0.00518156
Choline	0.149583	0.165165	-0.00528899
Glycolipids (GPC/PC)	1.96118e-10	5.194e-10	-0.142674
Proline	4.70735e-11	1.38683e-10	-0.0103224
Glycine	0.000743273	0.00101009	-0.0320298
Glycerol	0.058972	0.0710345	-0.00388112
Myoinositol	0.00624517	0.00769754	-0.00130032
Betaine	1.78273e-09	4.28818e-09	-0.0170337
Creatine	0.0859916	0.101279	-0.00330484
Serine	1.37286e-05	2.26455e-05	-0.0118603
Lactate	9.04115e-09	1.84277e-08	0.251544
Threonine	0.00145789	0.00189018	0.00900335
Mannose	0.00146222	0.00189018	0.00240311
Glucose	0.299731	0.311486	-0.0846232
Tyrosine	4.11236e-08	7.52966e-08	-0.00760092
Histidine	8.38378e-05	0.000126897	-0.0039725
Phenylalanine	4.1203e-08	7.52966e-08	0.0187093
UDP-Glucose	1.51967e-08	2.9837e-08	0.00323612
Formate	0.10179	0.11728	0.000279813
Glutamate	1.40794e-05	2.26455e-05	0.025372
CH3 fatty acids	9.36609e-34	4.9661e-32	2.3553
(-CH2)n fatty acids	1.27327e-24	1.3462e-23	9.00122
Beta-CH2 fatty acids	3.91698e-23	3.46267e-22	0.69012
CH2CH=C fatty acids	1.29763e-26	2.29667e-25	1.21675
Alpha-CH2 fatty acids	7.17554e-19	3.45945e-18	0.543986
C=CCH2C=C fatty acids	8.86966e-23	6.71586e-22	0.257462
Glyceryl C1,3H	4.0796e-12	1.3515e-11	0.183039
Glyceryl C2H	4.74626e-20	2.79722e-19	0.103006
CH=CH fatty acids	8.31873e-28	2.2048e-26	0.941277
BCAA: Branched chain amino acids; UDP: Uridine diphosphate; GPC: Glycerophosphocholine; PC: Phosphocholine

## Sheet: S3
Table S3: Metabolites Altered in Maternal Serum in PGDM Compared to Controls During Pregnancy
	PGDM vs. Control		Interaction (PGDM*Time)
Metabolite	pvalue	Estimate	pvalue	Estimate
HbA1c	4.81096e-21	2.17828	0.000122582	-0.310984
Leucine	0.108119	0.0764907	0.446746	-0.0138025
Isoleucine	0.00746609	0.0583438	0.0267468	-0.0190558
Valine	0.0750574	0.0964989	0.200307	-0.02747
BCAA	0.0398541	0.423028	0.179819	-0.107668
Isobutyrate	0.618036	0.00216111	0.495364	0.00112873
2-Oxoisovalerate	0.38617	-0.0364751	0.323228	0.0173696
Alanine	0.412799	-0.0878096	0.956093	-0.00240594
Arginine	0.570557	0.0017713	0.915859	0.000127285
Acetate	0.332644	-0.394133	0.0327261	0.365129
N-acetyl-glycoproteins	0.523738	0.149771	0.591303	0.0449278
Acetone	0.440487	-0.0323039	0.0439185	0.0354142
Acetoacetate	0.773638	-0.00857994	0.464876	0.00911176
3-Hydroxybutyrate	0.121216	-0.0387292	0.123454	0.0160337
Pyruvate	0.887528	-0.0023444	0.558664	-0.00399372
Succinate	0.0146117	-0.00995584	0.0183187	0.00334504
Glutamine	0.018235	-0.182583	0.136745	0.0434443
Citrate	0.0335695	-0.0355129	0.0501055	0.0130721
Methionine	0.215822	-0.00671546	0.80523	0.000539323
Asparagine	0.362045	-0.00376462	0.768571	0.000492031
Dimethylglycine	0.0385764	-0.00325016	0.135515	0.000901776
Lysine	0.171215	-0.0164826	0.813363	0.00109311
Creatinine	0.00623709	-0.0382053	0.376821	0.00454289
Ornithine	0.414763	-0.00918164	0.989996	5.78947e-05
Dimethylsulfone	0.0970441	-0.0110693	0.504501	0.00171892
Choline	0.532517	-0.0178531	0.790156	0.00293726
Glycolipids (GPC/PC)	0.369885	-0.144703	0.960703	-0.00302928
Proline	0.39583	-0.00942248	0.916675	-0.000452804
Glycine	0.0266846	-0.153723	0.296999	0.0295693
Glycerol	0.00461526	-0.0404849	0.106816	0.00914405
Myoinositol	0.0292342	-0.00786904	0.17581	0.00190798
Betaine	0.957211	0.000674332	0.979855	-0.000126716
Creatine	0.204992	0.0179445	0.332665	-0.00536035
Serine	0.128987	-0.029304	0.263237	0.00864963
Lactate	0.331645	-0.272823	0.657026	0.0520751
Threonine	0.0109739	-0.0559138	0.0144471	0.0209858
Mannose	0.0415484	0.012484	0.9977	6.80721e-06
Glucose	0.00164247	0.798971	0.459681	-0.0674224
Tyrosine	0.425031	0.00806356	0.192064	-0.00506153
Histidine	0.030268	-0.0160238	0.490638	0.00198717
Phenylalanine	0.834925	-0.00516103	0.775355	-0.00271201
UDP-Glucose	0.804589	-0.000989667	0.886855	0.000237707
Formate	0.121609	-0.00206545	0.126152	0.000714502
Glutamate	0.837437	-0.00818789	0.961236	-0.000721831
CH3 fatty acids	0.406189	0.884506	0.260975	0.460088
(-CH2)n fatty acids	0.36152	4.84043	0.23104	2.4256
Beta-CH2 fatty acids	0.328283	0.430507	0.181281	0.213216
CH2CH=C fatty acids	0.301186	0.703139	0.267036	0.288465
Alpha-CH2 fatty acids	0.378363	0.358585	0.187046	0.198313
C=CCH2C=C fatty acids	0.762758	0.0512699	0.152244	0.0944062
Glyceryl C1,3H	0.396268	0.167404	0.198296	0.0927763
Glyceryl C2H	0.174357	0.0991459	0.433796	0.0212108
CH=CH fatty acids	0.305357	0.53383	0.364581	0.180842
PGDM: Pre-gestational diabetes; BCAA: Branched chain amino acids; UDP: Uridine diphosphate; GPC: Glycerophosphocholine; PC: Phosphocholine

## Sheet: S4
Table S4: Metabolites Altered in Maternal Serum in GDM Compared to Controls During Pregnancy
	GDM vs. Control		Interaction (GDM*Time)
Metabolite	p-value	Estimate	pvalue	Estimate
HbA1c	0.774808	0.0452621	0.284474	0.062765
Leucine	0.970314	-0.00180307	0.756271	-0.00586679
Isoleucine	0.892485	0.00323249	0.29673	-0.0099331
Valine	0.538098	-0.0366255	0.963121	-0.00108698
BCAA	0.804006	-0.0550766	0.756684	-0.0270495
Isobutyrate	0.029889	-0.00975446	0.0517123	0.00348208
2-Oxoisovalerate	0.537214	-0.0399505	0.672449	0.0114094
Alanine	0.885993	-0.0168933	0.204651	-0.0608707
Arginine	0.0544047	0.00637203	0.071336	-0.00234643
Acetate	0.0324009	-0.0402207	0.0127855	0.0156366
N-acetyl-glycoproteins	0.0328282	0.406399	0.140371	-0.111678
Acetone	0.568726	0.0220994	0.796431	0.00416884
Acetoacetate	0.164679	-0.0504714	0.00232127	0.0465678
3-Hydroxybutyrate	0.138548	-0.0426317	0.0207988	0.0276798
Pyruvate	0.792365	0.00483371	0.234055	-0.00888827
Succinate	0.0127301	-0.0108845	0.00643523	0.00435233
Glutamine	0.0463082	-0.169	0.0428773	0.064688
Citrate	0.0511462	-0.0337653	0.0601363	0.0132863
Methionine	0.292805	-0.00643245	0.843931	0.000485995
Asparagine	0.833736	-0.000956362	0.808887	0.00044436
Dimethylglycine	0.90366	0.000228015	0.992418	6.80878e-06
Lysine	0.289593	-0.0137445	0.443641	0.00385877
Creatinine	0.0477224	-0.0305355	0.751191	0.00180874
Ornithine	0.501402	-0.00823802	0.747596	0.00163236
Dimethylsulfone	0.10636	-0.0119228	0.177367	0.0038518
Choline	0.610633	0.0154808	0.227543	-0.0144164
Glycolipids (GPC/PC)	0.748115	-0.0557432	0.737706	0.0223253
Proline	0.0949226	-0.0212329	0.452509	0.0037261
Glycine	0.0469007	-0.152963	0.274915	0.0343094
Glycerol	0.282566	-0.0172502	0.337238	0.00611186
Myoinositol	0.0929002	-0.00681216	0.453862	0.00117678
Betaine	0.17575	-0.0284753	0.0527885	0.0168896
Creatine	0.47511	-0.0116477	0.191431	0.00825128
Serine	0.0194015	-0.0513656	0.0768241	0.0154812
Lactate	0.487011	-0.227106	0.739848	0.045209
Threonine	0.0297324	-0.0500745	0.104986	0.0142118
Mannose	0.99862	1.03046e-05	0.301893	0.00241428
Glucose	0.37137	-0.563631	0.0333514	0.56219
Tyrosine	0.447786	-0.00843296	0.913856	-0.00045813
Histidine	0.0838187	-0.0142961	0.372985	0.0028657
Phenylalanine	0.165619	-0.0375489	0.67064	0.00444067
UDP-Glucose	0.845137	-0.000826948	0.718329	-0.000636401
Formate	0.0156547	-0.00358349	0.0185935	0.00124802
Glutamate	0.630055	-0.0208911	0.459665	-0.0125082
CH3 fatty acids	0.0659427	1.92262	0.255103	-0.457134
(-CH2)n fatty acids	0.0425129	9.71496	0.193901	-2.43188
Beta-CH2 fatty acids	0.0712608	0.691474	0.293159	-0.156298
CH2CH=C fatty acids	0.0351172	1.35962	0.172228	-0.341419
Alpha-CH2 fatty acids	0.0288848	0.781336	0.123571	-0.213527
C=CCH2C=C fatty acids	0.0884523	0.277481	0.413851	-0.052011
Glyceryl C1,3H	0.0197385	0.379262	0.0952459	-0.106071
Glyceryl C2H	0.0128389	0.163049	0.106031	-0.0406763
CH=CH fatty acids	0.0431728	0.998973	0.228518	-0.230872
GDM: Gestational diabetes mellitus; BCAA: Branched chain amino acids; UDP: Uridine diphosphate; GPC: Glycerophosphocholine; PC: Phosphocholine

## Sheet: S5
Table S5: Metabolites Altered in Maternal Serum in GDM Compared to PGDM During Pregnancy
	GDM vs. PGDM		Interaction (GDM:PGDM*Time)
Metabolite	p-value	Estimate	pvalue	Estimate
HbA1c	1.56121e-05	-2.08817	0.0425744	0.361432
Alanine	0.535739	0.0728145	0.236227	-0.0588794
Arginine	0.694947	0.00149236	0.251189	-0.00152188
Asparagine	0.628587	0.00274102	0.949364	-0.00014659
BCAA	0.0571515	-0.505931	0.445953	0.0742032
Dimethylglycine	0.194284	0.00338874	0.344999	-0.000908787
Glutamate	0.660296	-0.0206509	0.48811	-0.0111157
Glutamine	0.867003	0.0153074	0.425862	0.0249567
Glycine	0.684749	-0.0261581	0.529056	0.015563
Histidine	0.933898	-0.000854438	0.651482	0.00177854
Isoleucine	0.0418669	-0.0565539	0.444348	0.00768623
Leucine	0.144466	-0.0912365	0.722238	0.00725978
Lysine	0.789814	-0.00334184	0.239794	0.00487376
Methionine	0.848567	-0.00116047	0.847665	0.000455382
Ornithine	0.840628	0.00233706	0.803465	0.00109753
Phenylalanine	0.391651	-0.027654	0.732292	0.00458166
Proline	0.753361	-0.00350385	0.806271	0.0011383
Serine	0.410647	-0.0232316	0.515538	0.0072446
Threonine	0.879139	0.00451497	0.559482	-0.00669478
Tyrosine	0.243411	-0.0145082	0.447157	0.00380364
Valine	0.0524157	-0.128611	0.371447	0.0224925
Citrate	0.774409	-0.00703953	0.597156	0.00496085
Lactate	0.948768	0.0288508	0.971373	-0.00659051
Pyruvate	0.78517	0.00467364	0.521863	-0.00458044
Succinate	0.841261	-0.0011514	0.506087	0.00128904
Glucose	0.459449	-1.22635	0.377824	0.609411
Mannose	0.268629	-0.0120926	0.603937	0.0021939
UDP-Glucose	0.967309	0.000224825	0.688137	-0.000917539
Acetate	0.750494	0.362556	0.431465	-0.374512
Acetoacetate	0.533366	-0.0327936	0.102903	0.0359986
Acetone	0.509621	0.0536694	0.337984	-0.0325545
3-Hydroxybutyrate	0.899451	-0.00499318	0.447433	0.012603
CH3 fatty acids	0.423648	1.22032	0.0290121	-1.03406
(-CH2)n fatty acids	0.507095	5.80705	0.0391602	-5.65524
Beta-CH2 fatty acids	0.812833	0.18987	0.103623	-0.379113
CH2CH=C fatty acids	0.361482	0.908511	0.00927072	-0.774613
Alpha-CH2 fatty acids	0.555206	0.421112	0.0394308	-0.451272
C=CCH2C=C fatty acids	0.240506	0.27807	0.0323245	-0.164954
Glyceryl C1,3H	0.598785	0.190708	0.0564375	-0.20933
Glyceryl C2H	0.605492	0.0613022	0.0455392	-0.0660379
CH=CH fatty acids	0.445357	0.586323	0.0413594	-0.473818
Betaine	0.68559	-0.0188211	0.500726	0.0130538
Choline	0.847239	0.00616078	0.447084	-0.00794587
Glycolipids (GPC/PC)	0.755289	0.0574113	0.523853	0.0432019
N-acetyl-glycoproteins	0.458242	0.291569	0.0206665	-0.19031
Glycerol	0.323625	0.0174417	0.971	-0.000240539
Isobutyrate	0.0543095	-0.0129254	0.295852	0.00245502
Myoinositol	0.583978	0.00239047	0.503752	-0.00118528
2-Oxoisovalerate	0.549424	-0.0104873	0.251031	-0.00412547
Creatine	0.183533	-0.0309775	0.130196	0.0138273
Creatinine	0.55762	0.0093197	0.658688	-0.0026266
Dimethylsulfone	0.928908	-0.000716768	0.600599	0.00174048
Formate	0.580873	-0.000998917	0.597572	0.000366439

## Sheet: S6
Table S6: Metabolites Altered in Maternal Serum in PGDM Compared to Controls during Immediate Post-Partum Period
Metabolite	pvalue	FDR	Estimate
HbA1c	4.28385e-12	2.27044e-10	1.4868
Mannose	0.000386861	0.0102518	0.0221366
Glucose	0.00154177	0.0272379	1.01308
Histidine	0.00449952	0.0596187	-0.0215933
Creatinine	0.00994584	0.095848	-0.02851
Tyrosine	0.0108507	0.095848	-0.0195917
Acetone	0.0142461	0.107863	0.445061
(-CH2)n fatty acids	0.0201652	0.121938	9.0553
Asparagine	0.0253012	0.121938	-0.00795104
Glutamine	0.0284267	0.121938	-0.136748
Alpha-CH2 fatty acids	0.0307349	0.121938	0.672885
Glyceryl C1,3H	0.0312626	0.121938	0.329638
Ornithine	0.0373588	0.121938	-0.0188272
Beta-CH2 fatty acids	0.0387136	0.121938	0.662874
Acetoacetate	0.0399883	0.121938	0.167701
N-acetyl-glycoproteins	0.0426003	0.121938	0.236249
Glyceryl C2H	0.042748	0.121938	0.123388
CH2CH=C fatty acids	0.0430909	0.121938	1.07515
3-Hydroxybutyrate	0.0480244	0.121938	0.0801166
Methionine	0.0481518	0.121938	-0.00773751
Betaine	0.0483151	0.121938	0.0211174
CH=CH fatty acids	0.0528482	0.127316	0.796424
CH3 fatty acids	0.0599712	0.13498	1.50108
Creatine	0.0611231	0.13498	0.0231216
Lactate	0.078534	0.166492	-0.373172
C=CCH2C=C fatty acids	0.102854	0.209664	0.217058
Dimethylsulfone	0.112868	0.221557	-0.005295
Phenylalanine	0.152025	0.279788	-0.0305373
Succinate	0.153091	0.279788	0.005739
Citrate	0.171299	0.285849	-0.0200087
Lysine	0.173778	0.285849	-0.0179857
Alanine	0.176455	0.285849	-0.137126
Isoleucine	0.177981	0.285849	-0.0202745
Proline	0.192167	0.292155	-0.0109298
Leucine	0.192932	0.292155	-0.0412657
Glycolipids (GPC/PC)	0.208916	0.307571	-0.120338
Glycine	0.245397	0.351515	-0.0598404
UDP-Glucose	0.26259	0.366244	-0.00412884
BCAA	0.277494	0.377108	-0.146671
Threonine	0.341252	0.452158	-0.0184902
Dimethylglycine	0.397851	0.514295	-0.00116513
Valine	0.454088	0.573016	-0.0274544
Arginine	0.476259	0.587017	0.00142138
Glycerol	0.546328	0.658077	-0.00670136
2-Oxoisovalerate	0.585728	0.689858	-0.0137983
Myoinositol	0.63802	0.725101	0.0014483
Pyruvate	0.655608	0.725101	0.00684601
Formate	0.663717	0.725101	-0.000511917
Isobutyrate	0.676678	0.725101	0.00132888
Choline	0.684058	0.725101	-0.00839129
Acetate	0.834056	0.866764	0.00366879
Glutamate	0.916232	0.933852	-0.00379926
Serine	0.973732	0.973732	-0.000476583
PGDM: Pre-gestational diabetes; BCAA: Branched chain amino acids; UDP: Uridine diphosphate; GPC: Glycerophosphocholine; PC: Phosphocholine

## Sheet: S7
Table S7: Metabolites Altered in Maternal Serum in GDM Compared to Controls during Immediate Post-Partum Period
Metabolite	pvalue	FDR	Estimate
HbA1c	0.00303434	0.16082	0.401808
Mannose	0.0228997	0.606842	0.0105196
Asparagine	0.0657335	0.903336	0.00636701
2-Oxoisovalerate	0.123144	0.903336	-0.0394692
Creatine	0.134207	0.903336	0.0202666
Citrate	0.136638	0.903336	-0.0221933
Glucose	0.1414	0.903336	0.22638
Glyceryl C2H	0.142643	0.903336	0.0860053
Succinate	0.155245	0.903336	-0.0038765
Glyceryl C1,3H	0.170441	0.903336	0.189808
Glycerol	0.18974	0.914202	-0.0157593
Glycine	0.227745	0.930613	-0.0625346
Creatinine	0.228264	0.930613	-0.0136708
(-CH2)n fatty acids	0.270839	0.949557	3.95988
Alpha-CH2 fatty acids	0.278326	0.949557	0.310733
Ornithine	0.298663	0.949557	0.0104302
Histidine	0.316339	0.949557	-0.00781731
Dimethylsulfone	0.346876	0.949557	-0.00322704
Glutamate	0.377164	0.949557	-0.0269868
3-Hydroxybutyrate	0.380228	0.949557	-0.0128158
Choline	0.390437	0.949557	-0.0152837
Beta-CH2 fatty acids	0.395896	0.949557	0.248845
Proline	0.418299	0.949557	0.00734808
CH=CH fatty acids	0.432897	0.949557	0.315558
Glycolipids (GPC/PC)	0.447904	0.949557	-0.0729817
CH2CH=C fatty acids	0.472948	0.964086	0.372765
C=CCH2C=C fatty acids	0.518733	0.981167	0.0863548
Acetate	0.548353	0.981167	-0.00897769
Lysine	0.627672	0.981167	0.00650114
Acetoacetate	0.633964	0.981167	-0.010974
Dimethylglycine	0.687181	0.981167	0.000572853
CH3 fatty acids	0.721708	0.981167	0.275542
Myoinositol	0.724426	0.981167	0.00123781
Serine	0.728467	0.981167	-0.00473394
Tyrosine	0.739378	0.981167	0.0028294
Formate	0.740672	0.981167	-0.000362335
Acetone	0.745708	0.981167	0.00910148
Isobutyrate	0.755946	0.981167	0.000971058
N-acetyl-glycoproteins	0.776302	0.981167	0.0314663
Arginine	0.7957	0.981167	0.000501845
UDP-Glucose	0.807112	0.981167	0.000992582
Glutamine	0.818733	0.981167	0.0154825
Methionine	0.822937	0.981167	0.000900003
Betaine	0.831245	0.981167	0.00157958
Valine	0.8472	0.981167	0.00746042
Pyruvate	0.87988	0.981167	0.00229966
Leucine	0.900127	0.981167	-0.00405644
Lactate	0.907273	0.981167	-0.0253709
BCAA	0.923386	0.981167	-0.0137168
Alanine	0.925813	0.981167	0.0094484
Isoleucine	0.955202	0.981167	0.000930317
Phenylalanine	0.962655	0.981167	0.000937008
Threonine	0.997301	0.997301	6.92177e-05
GDM: Gestational diabetes mellitus; BCAA: Branched chain amino acids; UDP: Uridine diphosphate; GPC: Glycerophosphocholine; PC: Phosphocholine

## Sheet: S8
Table S8: Metabolites Altered in Maternal Serum in GDM compared to PGDM during Immediate Post-Partum Period
Metabolite	pvalue	FDR	Estimate (GDM:T2DM)
HbA1c	0.0161161	0.0575676	-0.952956
Alanine	0.117396	0.130426	0.233894
Arginine	0.948381	0.164964	0.000196173
Asparagine	0.00933757	0.213538	0.0151417
BCAA	0.0572394	0.393168	0.301969
Dimethylglycine	0.0790964	0.421373	0.00257627
Glutamate	0.965878	0.373548	0.00221278
Glutamine	0.0654994	0.341834	0.17779
Glycine	0.581335	0.307867	0.0398359
Histidine	0.0719624	0.303369	0.0158847
Isoleucine	0.0515976	0.315588	0.0383482
Leucine	0.0370913	0.294855	0.0658246
Lysine	0.0493365	0.293385	0.0385535
Methionine	0.0812893	0.274238	0.0107764
Ornithine	0.00108618	0.279474	0.0394231
Phenylalanine	0.247232	0.269271	0.0376994
Proline	0.0522793	0.260908	0.0288357
Serine	0.403275	0.249752	0.0156511
Threonine	0.283025	0.238599	0.0301766
Tyrosine	0.00492173	0.245922	0.0305596
Valine	0.0667596	0.28381	0.0902225
Citrate	0.954503	0.280856	0.000729986
Lactate	0.0855356	0.270522	0.464824
Pyruvate	0.98237	0.267677	-0.000528985
Succinate	0.493952	0.289533	-0.00492176
Glucose	0.459395	0.405493	-0.492926
Mannose	0.417313	0.411135	-0.00844992
UDP-Glucose	0.0848213	0.454586	0.00647973
Acetate	0.734389	0.451839	0.00921568
Acetoacetate	0.523682	0.50001	-0.117601
Acetone	0.452328	0.68947	-0.318116
3-Hydroxybutyrate	0.512791	0.691175	-0.0581308
CH3 fatty acids	0.0724404	0.688044	-2.23865
(-CH2)n fatty acids	0.116582	0.7051	-10.3737
Beta-CH2 fatty acids	0.112453	0.693842	-0.813931
CH2CH=C fatty acids	0.0836874	0.676332	-1.38044
Alpha-CH2 fatty acids	0.136572	0.683524	-0.75366
C=CCH2C=C fatty acids	0.198921	0.688933	-0.226709
Glyceryl C1,3H	0.209446	0.69687	-0.328026
Glyceryl C2H	0.240158	0.693879	-0.116638
CH=CH fatty acids	0.121212	0.708534	-0.950703
Betaine	0.749152	0.73359	-0.00584686
Choline	0.998084	0.74699	8.64772e-05
Glycolipids (GPC/PC)	0.477177	0.884605	0.0667913
N-acetyl-glycoproteins	0.0477026	0.882335	-0.365525
Glycerol	0.860897	0.886419	0.00241274
Isobutyrate	0.458197	0.970799	0.00288784
Myoinositol	0.769345	1	0.00117589
2-Oxoisovalerate	0.548111	1	-0.0104346
Creatine	0.917628	1	0.0018793
Creatinine	0.0928008	1	0.025334
Dimethylsulfone	0.606049	1	0.00192661
Formate	0.428405	0.998084	0.00123058

## Sheet: S9
Table S9: Metabolites Altered in Cord Serum in PGDM or GDM during Pregnancy
Metabolite	pvalue	FDR	Mean Control (SE)	Mean Diabetes (SE)	FC (Diabetes/Ctrl)
PGDM (n=6) vs. Controls (n=22)
Mannose	0.01789	0.53091	0.064 (0.003)	0.080 (0.009)	0.3404
Glucose	0.02042	0.53091	1.855 (0.083)	2.332 (0.214)	0.33015
Dimethylglycine	0.049152	0.59126	0.017 (0.001)	0.021 (0.003)	0.30704
Threonine	0.0642	0.59126	0.426 (0.018)	0.504 (0.036)	0.24115
Glycine	0.065901	0.59126	0.868 (0.034)	0.726 (0.067)	-0.25801
Creatine	0.082304	0.59126	0.272 (0.010)	0.314 (0.024)	0.20687
Glutamate	0.099135	0.59126	0.302 (0.036)	0.183 (0.019)	-0.72468
N-acetyl-glycoproteins	0.11436	0.59126	1.059 (0.041)	0.924 (0.037)	-0.1966
Valine	0.13274	0.59126	0.880 (0.034)	0.988 (0.042)	0.16723
Formate	0.13909	0.59126	0.035 (0.002)	0.028 (0.003)	-0.30297
C=CCH2C=C fatty acids	0.1411	0.59126	2.740 (0.056)	2.567 (0.065)	-0.093697
Betaine	0.1418	0.59126	0.258 (0.005)	0.275 (0.007)	0.087014
BCAA	0.14841	0.59126	2.144 (0.081)	2.387 (0.093)	0.15471
Glycerol	0.15918	0.59126	0.141 (0.011)	0.111 (0.004)	-0.34535
CH3 fatty acids	0.17101	0.59262	13.870 (0.345)	12.900 (0.333)	-0.10462
CH=CH fatty acids	0.18793	0.59262	2.882 (0.157)	2.465 (0.097)	-0.2257
Histidine	0.19374	0.59262	0.150 (0.007)	0.131 (0.008)	-0.19617
Glyceryl C2H	0.21898	0.63262	0.237 (0.016)	0.198 (0.009)	-0.25711
Alanine	0.2413	0.65984	1.831 (0.075)	2.014 (0.089)	0.13717
Isobutyrate	0.25378	0.65984	0.070 (0.003)	0.077 (0.003)	0.13648
Acetoacetate	0.30749	0.72639	0.196 (0.023)	0.257 (0.079)	0.39308
Succinate	0.31966	0.72639	0.056 (0.010)	0.036 (0.005)	-0.62573
CH2CH=C fatty acids	0.3239	0.72639	7.651 (0.213)	7.232 (0.096)	-0.081326
(-CH2)n fatty acids	0.35951	0.72639	23.585 (1.214)	21.370 (0.598)	-0.14229
Dimethylamine	0.36172	0.72639	0.039 (0.003)	0.034 (0.002)	-0.19744
Glycolipids (GPC/PC)	0.3632	0.72639	1.750 (0.068)	1.623 (0.064)	-0.1082
Beta-CH2 fatty acids	0.41114	0.74078	4.734 (0.073)	4.614 (0.043)	-0.036838
Serine	0.42515	0.74078	0.267 (0.008)	0.280 (0.015)	0.070606
Myoinositol	0.4516	0.74078	0.245 (0.018)	0.218 (0.019)	-0.17021
Lysine	0.45534	0.74078	0.482 (0.023)	0.521 (0.056)	0.11405
Isoleucine	0.4694	0.74078	0.299 (0.010)	0.314 (0.015)	0.07419
Alpha-CH2 fatty acids	0.47619	0.74078	2.941 (0.075)	2.834 (0.069)	-0.05369
Citrate	0.4804	0.74078	0.193 (0.012)	0.213 (0.034)	0.14709
3-Hydroxybutyrate	0.48435	0.74078	0.144 (0.014)	0.168 (0.042)	0.22115
Lactate	0.50152	0.74512	3.335 (0.378)	2.829 (0.239)	-0.23754
Acetone	0.52284	0.75521	0.269 (0.032)	0.319 (0.091)	0.24229
Methionine	0.57549	0.79814	0.084 (0.003)	0.087 (0.003)	0.052106
Proline	0.58326	0.79814	0.128 (0.003)	0.132 (0.003)	0.037659
Phenylalanine	0.60215	0.80286	0.282 (0.010)	0.295 (0.025)	0.062279
Arginine	0.64717	0.83668	0.068 (0.004)	0.072 (0.005)	0.071084
2-Oxoisovalerate	0.65969	0.83668	0.249 (0.027)	0.224 (0.039)	-0.15039
Ethanolamine	0.70984	0.87885	0.177 (0.009)	0.170 (0.008)	-0.054887
Choline	0.75827	0.91391	1.159 (0.221)	1.025 (0.102)	-0.17764
Ornithine	0.77331	0.91391	0.167 (0.010)	0.161 (0.017)	-0.052788
Glutamine	0.8322	0.94637	1.399 (0.057)	1.375 (0.061)	-0.025578
Glyceryl C1,3H	0.83717	0.94637	2.822 (0.033)	2.836 (0.033)	0.0069376
Leucine	0.86512	0.94807	0.736 (0.023)	0.727 (0.043)	-0.016919
Acetate	0.89175	0.94807	0.238 (0.008)	0.241 (0.021)	0.015974
Creatinine	0.89503	0.94807	0.338 (0.012)	0.335 (0.018)	-0.013807
Pyruvate	0.91161	0.94807	0.199 (0.013)	0.195 (0.039)	-0.025801
Asparagine	0.95724	0.97601	0.046 (0.002)	0.046 (0.002)	-0.0057935
Tyrosine	0.98765	0.98765	0.138 (0.006)	0.137 (0.012)	-0.0021098
GDM (n=7) vs. Controls (n=22)
Metabolite	pvalue	FDR	Mean Control (SE)	Mean Diabetes (SE)	FC (Diabetes/Ctrl)
Mannose	0.0003924	0.020405	0.064 (0.003)	0.086 (0.005)	0.44132
Dimethylglycine	0.016465	0.40423	0.017 (0.001)	0.022 (0.003)	0.38571
Glycine	0.029432	0.40423	0.868 (0.034)	0.720 (0.036)	-0.26921
Betaine	0.031094	0.40423	0.258 (0.005)	0.285 (0.013)	0.13987
Lactate	0.086252	0.58779	3.335 (0.378)	2.111 (0.211)	-0.65992
Glucose	0.09124	0.58779	1.855 (0.083)	2.168 (0.181)	0.22482
Glycerol	0.094376	0.58779	0.141 (0.011)	0.108 (0.005)	-0.39052
Isobutyrate	0.096609	0.58779	0.070 (0.003)	0.060 (0.003)	-0.21131
Creatinine	0.10173	0.58779	0.338 (0.012)	0.300 (0.016)	-0.17284
CH3 fatty acids	0.17266	0.71278	13.870 (0.345)	12.977 (0.285)	-0.096024
Arginine	0.17747	0.71278	0.068 (0.004)	0.078 (0.006)	0.19638
CH=CH2CH=C fatty acids	0.20255	0.71278	2.740 (0.056)	2.604 (0.044)	-0.072949
Ornithine	0.2078	0.71278	0.167 (0.010)	0.144 (0.009)	-0.21672
Beta-CH2 fatty acids	0.23163	0.71278	4.734 (0.073)	4.573 (0.026)	-0.049836
Asparagine	0.25521	0.71278	0.046 (0.002)	0.042 (0.003)	-0.12551
Creatine	0.26269	0.71278	0.272 (0.010)	0.295 (0.015)	0.11637
CH=CH fatty acids	0.26405	0.71278	2.882 (0.157)	2.556 (0.087)	-0.1732
Methionine	0.26423	0.71278	0.084 (0.003)	0.078 (0.003)	-0.103
Histidine	0.28846	0.71278	0.150 (0.007)	0.136 (0.005)	-0.14213
Succinate	0.29075	0.71278	0.056 (0.010)	0.037 (0.004)	-0.60997
2-Oxoisovalerate	0.32654	0.71278	0.249 (0.027)	0.306 (0.059)	0.29968
Acetoacetate	0.35543	0.71278	0.196 (0.023)	0.239 (0.039)	0.28679
Valine	0.35558	0.71278	0.880 (0.034)	0.942 (0.044)	0.098041
Acetate	0.36444	0.71278	0.238 (0.008)	0.254 (0.014)	0.09102
BCAA	0.3662	0.71278	2.144 (0.081)	2.287 (0.104)	0.092896
Pyruvate	0.36624	0.71278	0.199 (0.013)	0.175 (0.020)	-0.18118
CH2CH=C fatty acids	0.37344	0.71278	7.651 (0.213)	7.303 (0.077)	-0.067314
Phenylalanine	0.38663	0.71278	0.282 (0.010)	0.265 (0.014)	-0.09269
(-CH2)n fatty acids	0.39751	0.71278	23.585 (1.214)	21.701 (0.447)	-0.12013
Alpha-CH2 fatty acids	0.4273	0.72496	2.941 (0.075)	2.832 (0.045)	-0.054772
Leucine	0.45059	0.72496	0.736 (0.023)	0.772 (0.043)	0.070289
N-acetyl-glycoproteins	0.45261	0.72496	1.059 (0.041)	0.998 (0.053)	-0.085276
Alanine	0.46007	0.72496	1.831 (0.075)	1.727 (0.065)	-0.084668
Myoinositol	0.5337	0.81624	0.245 (0.018)	0.224 (0.022)	-0.13231
Proline	0.59948	0.86663	0.128 (0.003)	0.125 (0.007)	-0.040931
3-Hydroxybutyrate	0.61403	0.86663	0.144 (0.014)	0.158 (0.021)	0.13209
Isoleucine	0.61664	0.86663	0.299 (0.010)	0.308 (0.010)	0.046766
Lysine	0.63712	0.86936	0.482 (0.023)	0.503 (0.030)	0.061563
Glutamate	0.67537	0.86936	0.302 (0.036)	0.273 (0.044)	-0.14494
Glyceryl C2H	0.68412	0.86936	0.237 (0.016)	0.225 (0.011)	-0.073928
Glycolipids (GPC/PC)	0.69127	0.86936	1.750 (0.068)	1.803 (0.100)	0.043769
Glutamine	0.71365	0.86936	1.399 (0.057)	1.360 (0.055)	-0.041391
Citrate	0.7189	0.86936	0.193 (0.012)	0.184 (0.022)	-0.06912
Glyceryl C1,3H	0.82778	0.95645	2.822 (0.033)	2.809 (0.026)	-0.0067832
Ethanolamine	0.83854	0.95645	0.177 (0.009)	0.174 (0.007)	-0.027407
Acetone	0.84609	0.95645	0.269 (0.032)	0.282 (0.062)	0.067738
Formate	0.91822	0.99047	0.035 (0.002)	0.034 (0.003)	-0.01773
Choline	0.93589	0.99047	1.159 (0.221)	1.191 (0.108)	0.039936
Tyrosine	0.98098	0.99047	0.138 (0.006)	0.138 (0.007)	0.0028595
Dimethylamine	0.98408	0.99047	0.039 (0.003)	0.039 (0.005)	0.0040737
Threonine	0.98633	0.99047	0.426 (0.018)	0.427 (0.025)	0.0020928
Serine	0.99047	0.99047	0.267 (0.008)	0.267 (0.008)	0.00092759
Diabetic (n=13) vs. Controls (n=22)
Mannose	0.00035172	0.018289	0.063568	0.083624	0.0017382	0.0023795	0.39562
Glycine	0.0085054	0.1814	0.86801	0.72285	0.022203	0.017322	-0.26403
Dimethylglycine	0.011533	0.1814	0.016942	0.021593	0.00047376	0.00095567	0.34993
Glucose	0.013954	0.1814	1.8553	2.2439	0.054099	0.067527	0.27439
Betaine	0.019482	0.20262	0.25847	0.28006	0.0033815	0.0036566	0.11571
Glycerol	0.030899	0.26779	0.14118	0.10928	0.0069169	0.0016615	-0.36949
CH3 fatty acids	0.060657	0.39671	13.87	12.941	0.22416	0.10415	-0.099983
CH=CH2CH=C fatty acids	0.061152	0.39671	2.7395	2.5873	0.036486	0.018324	-0.082488
Creatine	0.068662	0.39671	0.27183	0.30347	0.0066316	0.0067201	0.15884
CH=CH fatty acids	0.090534	0.426	2.8818	2.5136	0.10214	0.031773	-0.19719
Lactate	0.091512	0.426	3.3352	2.4423	0.24571	0.091638	-0.44955
Histidine	0.10563	0.426	0.1502	0.1338	0.0046163	0.0021683	-0.16682
Valine	0.1074	0.426	0.87982	0.96304	0.022263	0.01501	0.13039
BCAA	0.11866	0.426	2.1443	2.3331	0.052368	0.034696	0.12176
Glycoprotein	0.12288	0.426	1.0586	0.96368	0.026972	0.016776	-0.13559
Succinate	0.14859	0.46984	0.056233	0.03666	0.0064781	0.0014948	-0.61722
Beta-CH2 fatty acids	0.1536	0.46984	4.7336	4.5919	0.047319	0.012032	-0.043823
Glutamate	0.17624	0.50913	0.30224	0.23161	0.023174	0.01375	-0.38404
CH2CH=C fatty acids	0.18688	0.51146	7.6513	7.2699	0.13882	0.029528	-0.073765
(-CH2)n fatty acids	0.21495	0.51214	23.585	21.548	0.78938	0.17661	-0.13032
Arginine	0.22315	0.51214	0.068251	0.075201	0.0023216	0.0020268	0.1399
Creatinine	0.22648	0.51214	0.33788	0.31585	0.0075359	0.0062163	-0.097256
Acetoacetate	0.2358	0.51214	0.19567	0.24713	0.014721	0.020136	0.33682
Threonine	0.23637	0.51214	0.42609	0.46221	0.012025	0.011591	0.11736
Glyceryl C2H	0.26556	0.55237	0.23692	0.2127	0.010184	0.004022	-0.15559
Alpha-CH2 fatty acids	0.2936	0.57152	2.9412	2.8326	0.048475	0.019006	-0.054272
Ornithine	0.29675	0.57152	0.16701	0.15169	0.0063129	0.0045172	-0.13874
Formate	0.31567	0.58624	0.03463	0.031375	0.0013609	0.0010818	-0.14242
Myoinositol	0.35267	0.63237	0.24533	0.22116	0.011559	0.007099	-0.14967
Asparagine	0.40309	0.68688	0.046044	0.043893	0.0010868	0.00084853	-0.069021
Isoleucine	0.40949	0.68688	0.29858	0.31115	0.0067408	0.0042781	0.059488
Lysine	0.43272	0.70317	0.48178	0.51138	0.014813	0.014705	0.086025
3-Hydroxybutyrate	0.45121	0.711	0.14382	0.16224	0.0088675	0.010708	0.17388
Acetate	0.50574	0.77348	0.23812	0.2477	0.005419	0.0060087	0.056868
Pyruvate	0.53503	0.79491	0.19893	0.18466	0.0083664	0.010068	-0.10738
Dimethylamine	0.58863	0.81818	0.038792	0.036561	0.0017489	0.0013632	-0.085452
Serine	0.59356	0.81818	0.26688	0.27315	0.0049324	0.0039909	0.033505
Acetone	0.60589	0.81818	0.26948	0.2992	0.02058	0.025793	0.15093
2-Oxoisovalerate	0.66523	0.81818	0.24852	0.26806	0.017338	0.018424	0.10919
Isobutyrate	0.67327	0.81818	0.069799	0.067874	0.0019254	0.0015342	-0.040334
Methionine	0.67335	0.81818	0.084012	0.082321	0.0017453	0.0012253	-0.029338
Leucine	0.68075	0.81818	0.73573	0.75155	0.015177	0.014986	0.030693
Glutamine	0.68743	0.81818	1.3992	1.3666	0.037135	0.019594	-0.034071
Ethanolamine	0.69231	0.81818	0.17684	0.172	0.0057157	0.0025124	-0.040025
Glycolipids (GPC/PC)	0.77578	0.89646	1.7496	1.7202	0.044511	0.032247	-0.024388
Alanine	0.80066	0.89873	1.831	1.8591	0.048831	0.033073	0.021972
Citrate	0.82901	0.89873	0.19268	0.19737	0.0078871	0.0095841	0.034706
Phenylalanine	0.82959	0.89873	0.28249	0.27877	0.0067284	0.0068866	-0.019093
Choline	0.88102	0.93496	1.1588	1.1144	0.14362	0.037758	-0.056425
Proline	0.94316	0.98089	0.12832	0.12795	0.0019741	0.0021037	-0.0041261
Glyceryl C1,3H	0.98519	0.9953	2.8221	2.8213	0.021248	0.010081	-0.00043431
Tyrosine	0.9953	0.9953	0.13755	0.13761	0.0038573	0.0031584	0.00056811
GDM (n=7) vs. PGDM (n=6)
Metabolite	pvalue	FDR	Mean GDM (SE)	Mean PGDM (SE)	FC (GDM/PGDM)
Isobutyrate	0.0020386	1	0.06 (0.003)	0.08 (0.003)	-0.34779
Alanine	0.022528	0.759794	1.73 (0.065)	2.01 (0.089)	-0.22184
Lactate	0.04478	0.93395	2.11 (0.211)	2.83 (0.239)	-0.42239
Methionine	0.067649	1	0.08 (0.003)	0.09 (0.003)	-0.15511
Glyceryl C2H	0.096776	0.99113	0.23 (0.011)	0.20 (0.009)	0.18318
Threonine	0.099009	0.915864	0.43 (0.025)	0.50 (0.036)	-0.23906
Glutamate	0.10228	0.935807	0.27 (0.044)	0.18 (0.019)	0.57974
Formate	0.16616	0.949768	0.03 (0.003)	0.03 (0.003)	0.28524
Creatinine	0.1706	1	0.30 (0.016)	0.33 (0.018)	-0.15903
Glycolipids (GPC/PC)	0.17291	0.969261	1.80 (0.100)	1.62 (0.064)	0.15197
2-Oxoisovalerate	0.28623	0.858078	0.31 (0.059)	0.22 (0.039)	0.45007
N-acetyl-glycoproteins	0.2899	0.899132	1.00 (0.053)	0.92 (0.037)	0.11133
Choline	0.28996	0.99552	1.19 (0.108)	1.02 (0.102)	0.21758
Phenylalanine	0.29633	0.964701	0.26 (0.014)	0.29 (0.025)	-0.15497
Asparagine	0.30316	1	0.04 (0.003)	0.05 (0.002)	-0.11972
Ornithine	0.3623	1	0.14 (0.009)	0.16 (0.017)	-0.16393
Dimethylamine	0.37657	1	0.04 (0.005)	0.03 (0.002)	0.20152
Beta-CH2 fatty acids	0.41494	0.959298	4.57 (0.026)	4.61 (0.043)	-0.012998
Proline	0.43193	0.945211	0.12 (0.007)	0.13 (0.003)	-0.07859
Serine	0.43313	0.941429	0.27 (0.008)	0.28 (0.015)	-0.069678
Arginine	0.44779	1	0.08 (0.006)	0.07 (0.005)	0.12529
Citrate	0.46409	1	0.18 (0.022)	0.21 (0.034)	-0.21621
Valine	0.46646	0.776187	0.94 (0.044)	0.99 (0.042)	-0.069193
Leucine	0.47522	0.106007	0.77 (0.043)	0.73 (0.043)	0.087208
BCAA	0.49605	0.879437	2.29 (0.104)	2.39 (0.093)	-0.061819
CH=CH fatty acids	0.49776	0.9792	2.56 (0.087)	2.46 (0.097)	0.052501
Creatine	0.50327	0.92601	0.29 (0.015)	0.31 (0.024)	-0.090496
Betaine	0.50896	0.933091	0.28 (0.013)	0.27 (0.007)	0.052854
Glyceryl C1,3H	0.53064	0.988166	2.81 (0.026)	2.84 (0.033)	-0.013721
Mannose	0.56439	0.902509	0.09 (0.005)	0.08 (0.009)	0.10093
Glucose	0.56748	0.904225	2.17 (0.181)	2.33 (0.214)	-0.10533
CH2CH=C fatty acids	0.57421	0.949597	7.30 (0.077)	7.23 (0.096)	0.014012
Histidine	0.58766	0.970151	0.14 (0.005)	0.13 (0.008)	0.054044
Acetate	0.61555	0.985689	0.25 (0.014)	0.24 (0.021)	0.075047
Glycerol	0.62862	0.978276	0.11 (0.005)	0.11 (0.004)	-0.045169
C=CCH2C=C fatty acids	0.63406	0.997286	2.60 (0.044)	2.57 (0.065)	0.020748
Pyruvate	0.64217	1	0.18 (0.020)	0.20 (0.039)	-0.15538
(-CH2)n fatty acids	0.66078	0.961827	21.70 (0.447)	21.37 (0.598)	0.022154
Acetone	0.74185	1	0.28 (0.062)	0.32 (0.091)	-0.17455
Isoleucine	0.74627	0.585728	0.31 (0.010)	0.31 (0.015)	-0.027424
Ethanolamine	0.76063	1	0.17 (0.007)	0.17 (0.008)	0.02748
Lysine	0.76712	1	0.50 (0.030)	0.52 (0.056)	-0.052486
Dimethylglycine	0.77384	1	0.02 (0.003)	0.02 (0.003)	0.078675
3-Hydroxybutyrate	0.82673	1	0.16 (0.021)	0.17 (0.042)	-0.089061
Acetoacetate	0.83235	1	0.24 (0.039)	0.26 (0.079)	-0.10629
Myoinositol	0.84861	0.951902	0.22 (0.022)	0.22 (0.019)	0.037901
Glutamine	0.85829	1	1.36 (0.055)	1.37 (0.061)	-0.015814
CH3 fatty acids	0.86287	0.977045	12.98 (0.285)	12.90 (0.333)	0.0085914
Glycine	0.93975	0.951492	0.72 (0.036)	0.73 (0.067)	-0.011196
Succinate	0.95016	1	0.04 (0.004)	0.04 (0.005)	0.015766
Tyrosine	0.97207	0.989133	0.14 (0.007)	0.14 (0.012)	0.0049692
Alpha-CH2 fatty acids	0.9792	0.934776	2.83 (0.045)	2.83 (0.069)	-0.0010817
PGDM: Pre-gestational diabetes; GDM: Gestational diabetes mellitus; BCAA: Branched chain amino acids; UDP: Uridine diphosphate; GPC: Glycerophosphocholine; PC: Phosphocholine

## Sheet: S10
Table S10: Maternal Demographics
	Non-diabetic	Pre-gestational	GDM
No. Subjects
	106	20	16
No. Samples
1st Trimester	62	6	7
2nd Trimester	34	5	3
3rd Trimester	77	15	12
Post-partum	57	12	12
Maternal Age-Mean (SD)
	28.09 (5.2)	29.95 (4.8)	31.06 (5.4)*
BMI at delivery-Mean (SD)
	33.76 (8.3)	36.06 (6.19)	38.99 (9.40)*
Race- No. (%)
White	62 (58.5)	11 (55.0)	9 (56.2)
Black	31 (29.2)	7 (35.0)	2 (12.5)
Asian	7 (6.6)	0 (0)	1 (6.25)
Hispanic	6 (5.6)	2 (10.0)	3 (18.7)
Other	0 (0)	0 (0)	1 (6.25)
Hypertension-No. (%)
	19 (17.9)	6 (30)	3 (18.7)
HbA1c-Mean (SD)
Total	5.12 (0.3)	6.61 (0.8)*	5.38 (0.4)*
1st Trimester	5.05 (0.3)	6.92 (1.1)*	5.21 (0.4)
2nd Trimester	4.99 (0.2)	6.64 (0.9)*	5.17 (0.3)
3rd Trimester	5.24 (0.4)	6.47 (0.6)*	5.53 (0.3)*
Post-partum	5.29 (0.3)	6.76 (1.0)*	5.74 (0.5)*
Casearean Delivery
	42 (39.6)	15 (75)	11 (68.7)
Gestational Age at Delivery in Weeks (SD)
	38.20 (2.3)	36.30 (2.2)*	38.38 (1.22)
PGDM: Pre-gestational diabetes; GDM: Gestational diabetes mellitus; SD Standard Deviation

[truncated: 1 more sheets: S11]
